# Supplementary material
Source: PubMed Central journal article supplement (PMC4545516)
Supplement: NIHMS64564-supplement-Supplementary_figure_1.pdf [file NIHMS64564-supplement-Supplementary_figure_1.pdf]

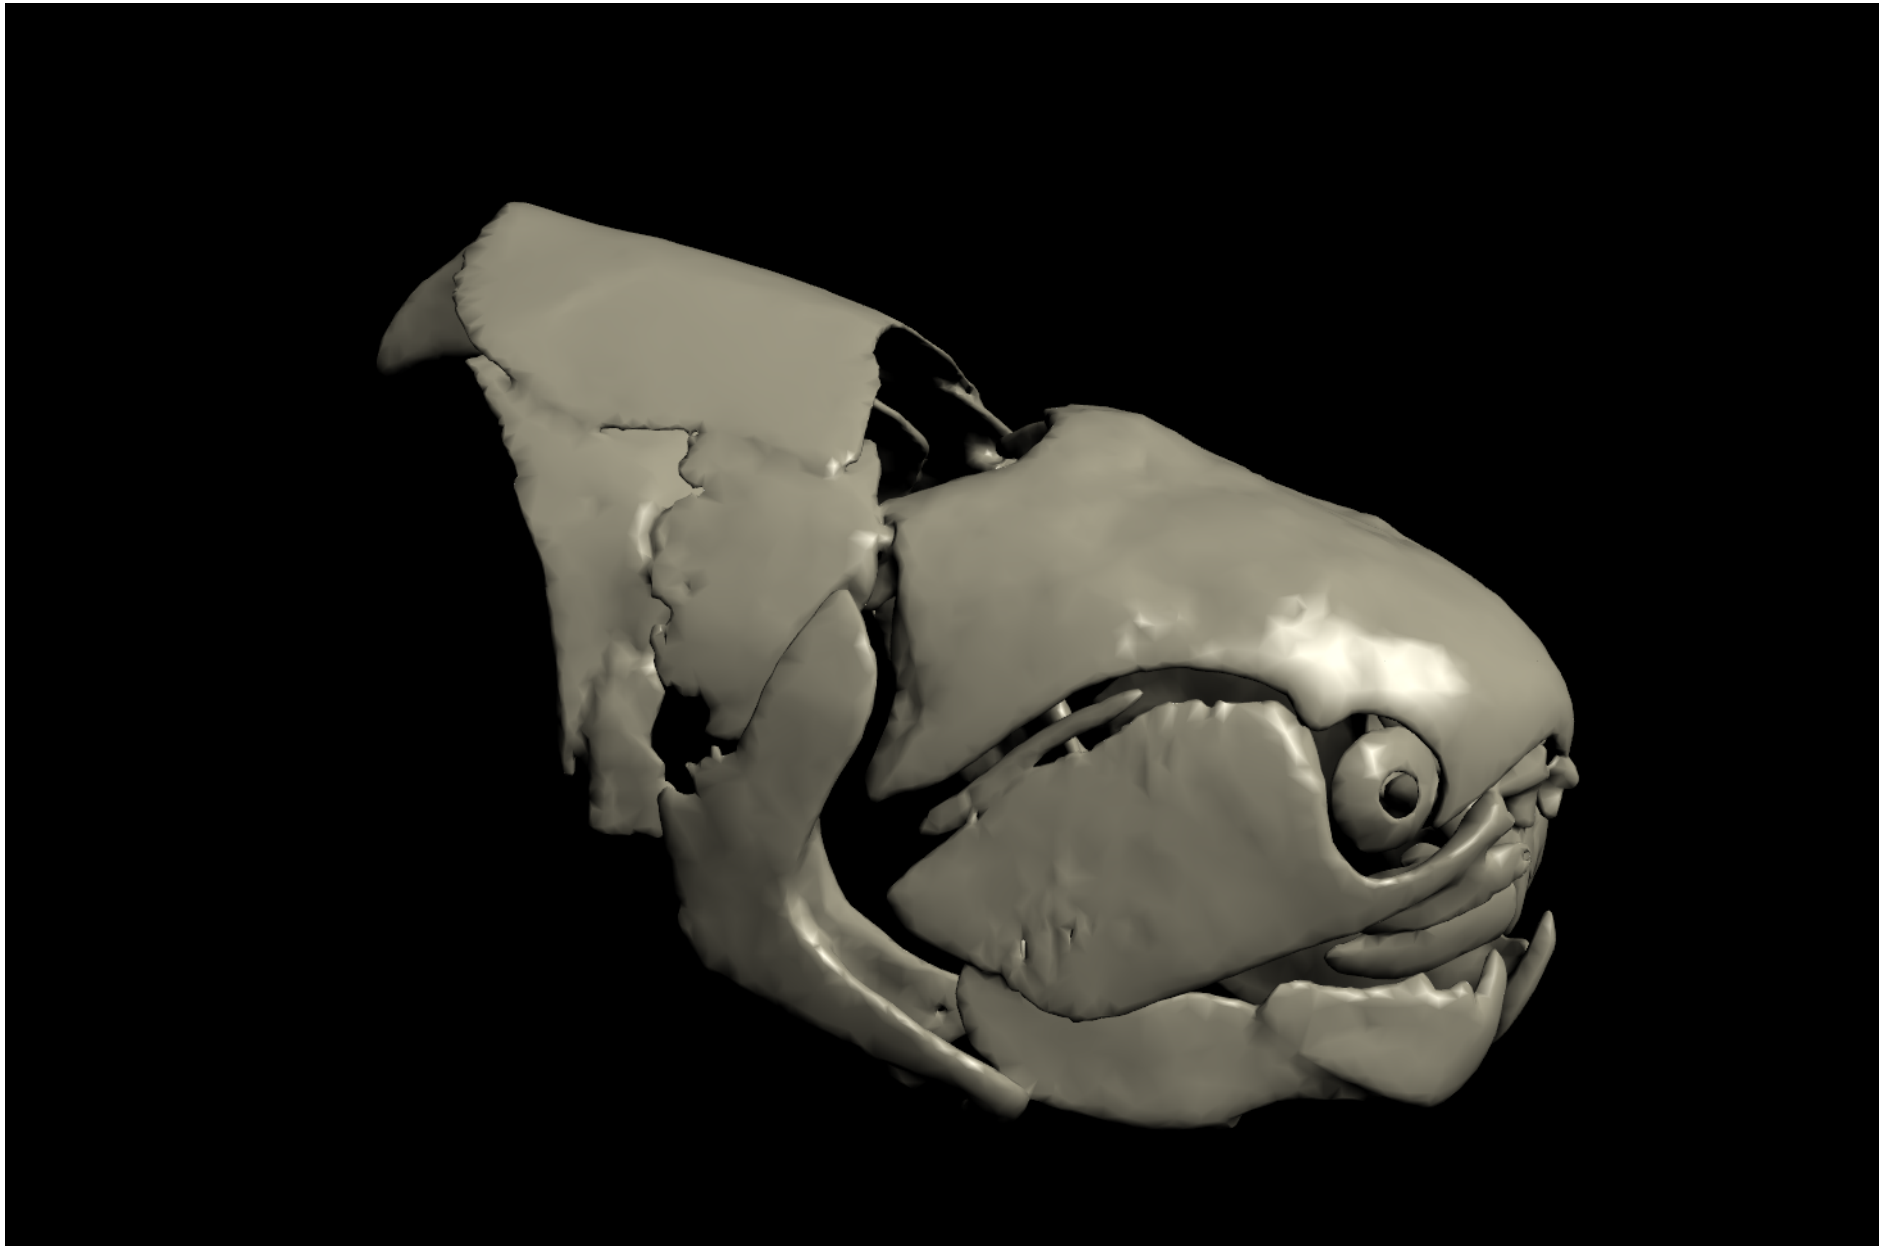

FIGURE 1— Digital surface model of the skull and dermal shoulder girdle of *Dunkleosteus terrelli*. 3D content can be activated by clicking on the figure.
